# Supplementary material for: Pharmacodynamic and Pharmacokinetic Properties of Full Phosphorothioate Small Interfering RNAs for Gene Silencing In Vivo
Source: PubMed Central journal article supplement (PMC8215415; doi:10.1089/nat.2020.0852), 2021-06-04
Supplement: Supp_FigS3.pdf [file Supp_FigS3.pdf]

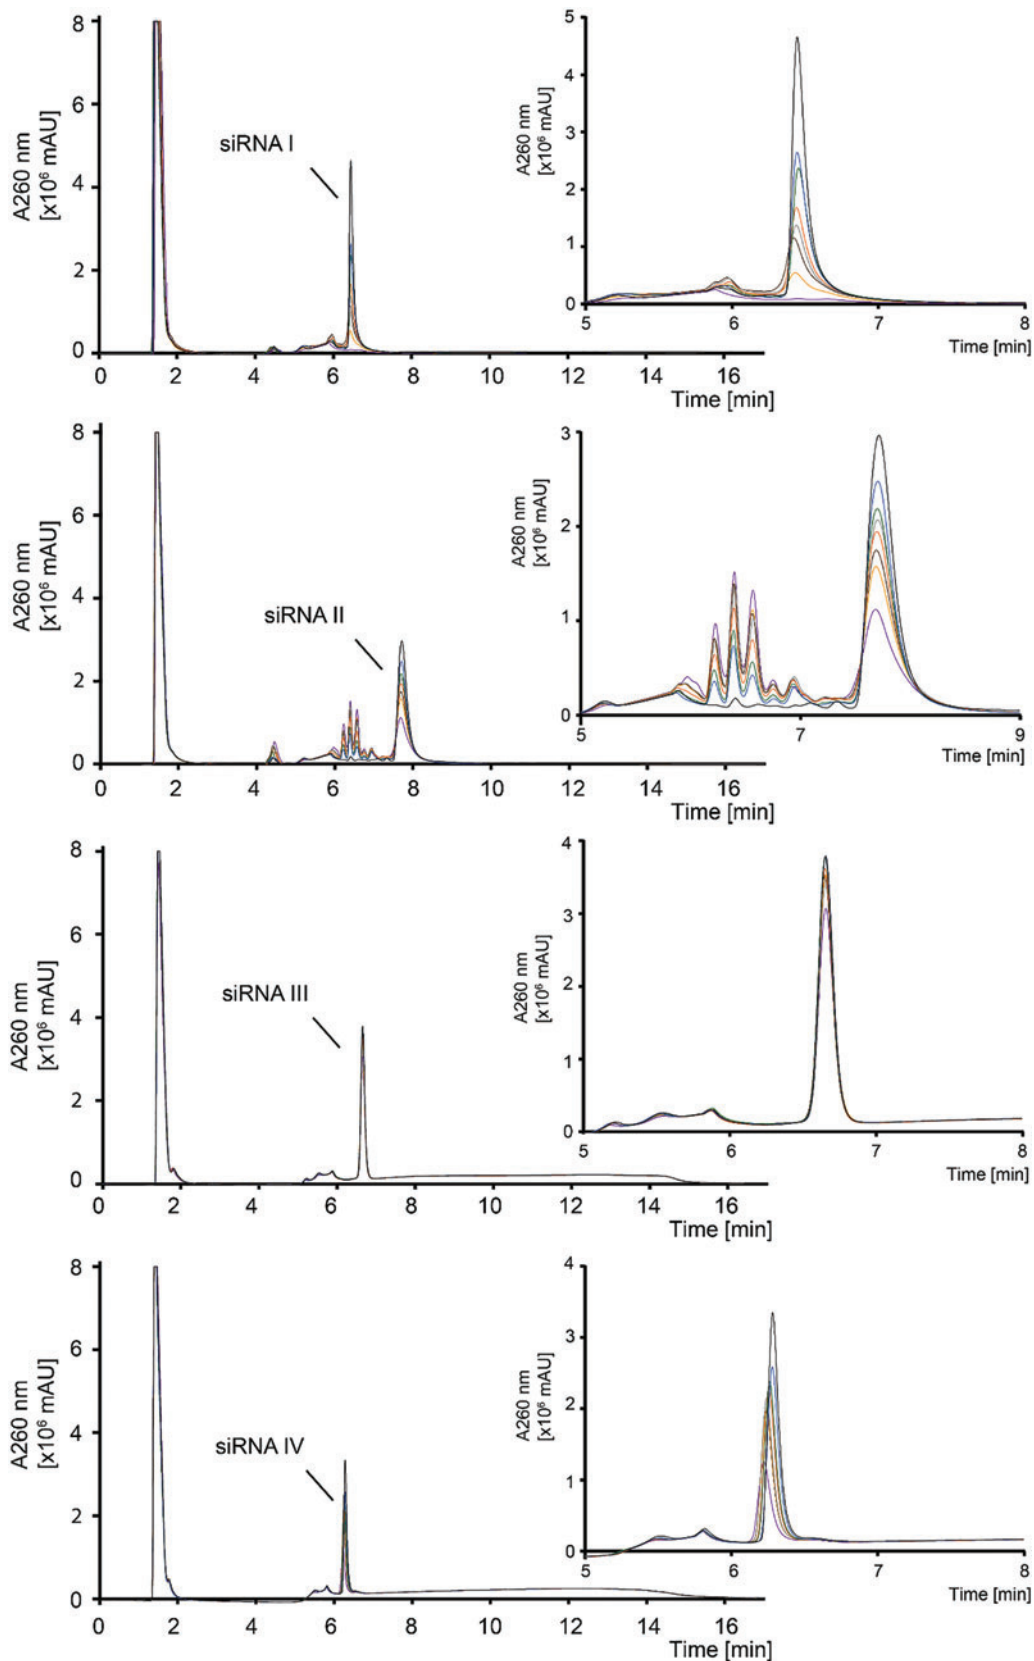

**SUPPLEMENTARY FIG. S3.** Representative anion-exchange HPLC chromatograms from serum stability assays. siRNAs were incubated in 50% mouse serum for the indicated time points. Samples were analyzed on a Hitachi VWR LaChrom Elite HPLC fitted with a DNA Pac PA200 (4×250 mm) anion exchange column and a DNA Pac PA200 (4×50 mm) guard column at 30°C. UV absorption was monitored at 260 nm. The gradient was 100% A for 2 min, followed by 54% eluent B within 5 min, increase to 100% B within 2 min, hold 100% B for 1 min, switch to 100% A within 2 min, and hold 100% A for 5 min. Eluent A was a 1:1 mixture (v:v) of buffer A and ACN. Buffer A was an aqueous solution of 1 mM EDTA and 25 mM Tris HCl (pH=8.5). Eluent B was a 1:1 mixture (v:v) of buffer B and ACN. Buffer B was an aqueous solution of 1 mM EDTA, 25 mM Tris HCl, and 1.6 M NaClO<sub>4</sub> (pH=8.5). HPLC, high performance liquid chromatography; EDTA, ethylenediaminetetraacetic acid; ACN, acetonitrile.

(continued)

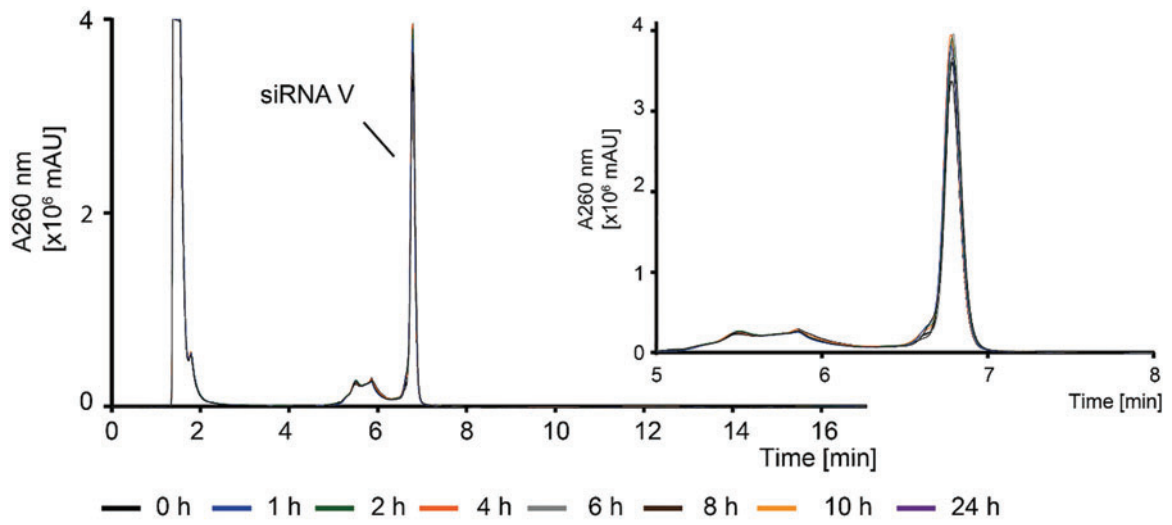

SUPPLEMENTARY FIG. S3. (Continued).
